# Supplementary material for: Imaging mass spectrometry differentiates the effects of doxorubicin formulations on non-targeted tissues
Source: Royal Society of Chemistry journal article supplement (doi:10.1039/d2an00355d), 2022-01-01

**SUPPLEMENTARY MATERIALS**

**Imaging Mass Spectrometry Differentiates Effects of Doxorubicin Formulations on  
Non-targeted Tissues**

**Authors**

Željko Debeljak<sup>a,b\*</sup>, Ivana Vinković Vrček<sup>c</sup>, Nikša Drinković<sup>d</sup>, Vedran Micek<sup>e</sup>, Emerik Galić<sup>e</sup>, Dunja Gorup<sup>f</sup>, Marija Ćurlin<sup>e</sup>, Dario Mandić<sup>a,b</sup>, Ana Bandjak<sup>a</sup>, Barbara Pem<sup>c</sup>, Nikolina Kalčec<sup>c</sup>, Krunoslav Ilić<sup>e</sup>, Ivan Pavičić<sup>c</sup>, Suzana Mimica<sup>a,b</sup>, Nazende Günday-Türel<sup>h</sup>, Emre Türel<sup>h</sup>

<sup>a</sup> University Hospital Osijek, Osijek, Croatia

<sup>b</sup> JJ Strossmayer University of Osijek, Faculty of Medicine, Osijek, Croatia

<sup>c</sup> Institute for Medical Research and Occupational Health, Zagreb, Croatia

<sup>d</sup> Poliklinika Drinković, Zagreb, Croatia

<sup>e</sup> JJ Strossmayer University of Osijek, Faculty of Agrobiotechnical Sciences, Osijek, Croatia

<sup>f</sup> University of Zagreb, School of Medicine, Zagreb

<sup>g</sup> Croatian Catholic University, Zagreb, Croatia

<sup>h</sup> MyBiotech, Überherrn, Germany

\* Corresponding author:

Assoc. Prof. Željko Debeljak, PhD, EUSpLM

Clinical Institute of Laboratory Diagnostics, University Hospital Osijek, J. Huttlera 4, 31 000 Osijek, Croatia and

Department of Pharmacology, JJ Strossmayer University of Osijek, Faculty of Medicine, J. Huttlera 4, 31 000 Osijek, Croatia

e-mail: zeljko.debeljak@gmail.com

## **Contents**

- S1. Detailed PCA
- S2. Complete List of Putative Annotations of Fingerprint m/z Values
- S3. Light Microscopy Images with Depicted Glomerules, Distal and Proximal Tubules
- S4. List of Tissue Specific m/z Values Associated with Administration of LPS DOX
- S5. Physicochemical Characterization of Nanoformulations
- S6. Animal Experiments
- S7. Average Mass Spectra

If not stated otherwise abbreviations used here correspond to the ones given in the accompanying article.

## S1. Detailed PCA

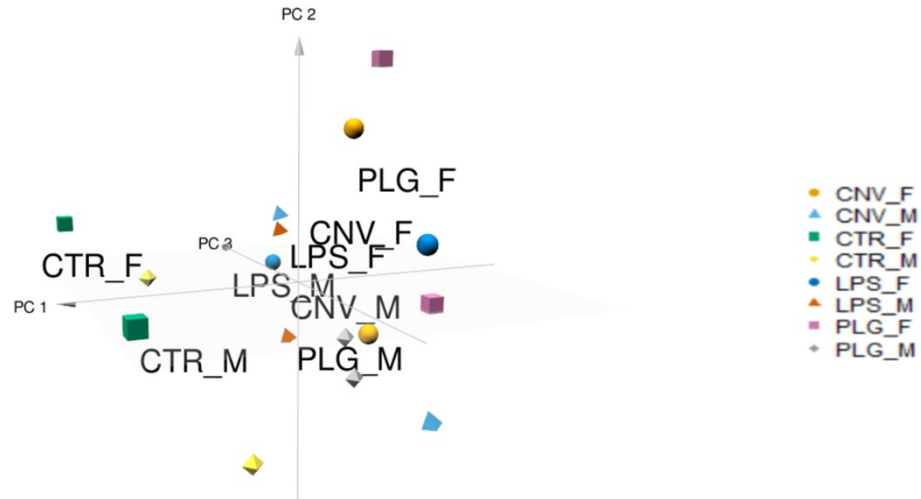

Each polygon represents a mass spectrum coming from the individual animal. 80.9% of data variance has been explained using 3 principle components. Class labels are placed at centroids corresponding to each group. Mass spectra were recorded by application of IMS on kidney cortex samples of 4 groups of rats: animals treated with CNV, LPS and PLG doxorubicin dosage forms and a CTR group.  $m/z$  values averaged over all recorded pixels were used. 2 M and 2 F animals per group were enrolled in the study.

PCA of mass spectra demonstrates existence of chemical differences between controls and treatments (separated along the PC1 axis). Gender differences are also visible (separated along the PC2 axis). It also demonstrates similar response to all treatments (dispersed along PC2 and PC3 axis). It is worth of noticing that gender differences make more impact on the mass spectra than the selection of dosage form does.

## S2. Complete List of Putative Annotations of Fingerprint m/z Values

| Formulation                                                                                        | m/z     | HMDB search hits ( $\pm 50$ ppm)/ Putative metabolites   |
|----------------------------------------------------------------------------------------------------|---------|----------------------------------------------------------|
| CNV                                                                                                | 283.072 | Multiple endogenous compounds                            |
|                                                                                                    | 291.109 | Multiple endogenous compounds                            |
|                                                                                                    | 304.112 | Multiple endogenous compounds                            |
|                                                                                                    | 319.097 | Multiple endogenous compounds                            |
|                                                                                                    | 334.151 | Multiple endogenous compounds                            |
|                                                                                                    | 340.117 | Multiple endogenous compounds                            |
|                                                                                                    | 368.112 | Phosphatidylserine                                       |
|                                                                                                    | 374.161 | Tryptophyl-Phenylalanine                                 |
|                                                                                                    | 375.135 | cyclic N-Acetylserotonin glucuronide                     |
|                                                                                                    | 448.306 | Glycocholic acid/3a,7b,12a-Trihydroxyoxocholanyl-Glycine |
|                                                                                                    | 455.081 | 17-Beta-Estradiol-3,17-beta-sulfate                      |
|                                                                                                    | 458.095 | No endogenous compounds                                  |
|                                                                                                    | 468.143 | Tetrahydrofolic acid                                     |
|                                                                                                    | 744.454 | Multiple endogenous compounds                            |
|                                                                                                    | 753.592 | Multiple endogenous compounds                            |
|                                                                                                    | 758.127 | No hits                                                  |
|                                                                                                    | 797.473 | Multiple endogenous compounds                            |
|                                                                                                    | 815.619 | Multiple endogenous compounds                            |
|                                                                                                    | 841.550 | Multiple endogenous compounds                            |
|                                                                                                    | 845.514 | Multiple endogenous compounds                            |
| LPS & PLG                                                                                          | 850.603 | Multiple endogenous compounds                            |
|                                                                                                    | 856.149 | No endogenous compounds                                  |
|                                                                                                    | 204.122 | L-Acetylcarnitine*                                       |
|                                                                                                    | 322.110 | Multiple endogenous compounds                            |
|                                                                                                    | 365.288 | Multiple endogenous compounds                            |
|                                                                                                    | 377.128 | Multiple endogenous compounds                            |
|                                                                                                    | 377.166 | LysoPA(i-12:0/0:0)/1-dodecanoyl-glycero-3-phosphate      |
|                                                                                                    | 382.063 | No endogenous compounds                                  |
|                                                                                                    | 383.172 | Multiple endogenous compounds                            |
|                                                                                                    | 383.211 | Multiple endogenous compounds                            |
|                                                                                                    | 400.928 | No hits                                                  |
|                                                                                                    | 426.017 | Multiple endogenous compounds                            |
|                                                                                                    | 432.023 | No endogenous compounds                                  |
|                                                                                                    | 448.082 | No endogenous compounds                                  |
|                                                                                                    | 449.024 | No endogenous compounds                                  |
|                                                                                                    | 478.365 | Multiple endogenous compounds                            |
|                                                                                                    | 504.350 | LysoPC(18:1(9Z)/0:0) isomers                             |
|                                                                                                    | 505.360 | LysoPA(i-24:0/0:0)                                       |
|                                                                                                    | 512.177 | Multiple endogenous compounds                            |
|                                                                                                    | 585.030 | No endogenous compounds                                  |
|                                                                                                    | 623.009 | No endogenous compounds                                  |
|                                                                                                    | 623.071 | No endogenous compounds                                  |
|                                                                                                    | 666.845 | No hits                                                  |
|                                                                                                    | 679.907 | No hits                                                  |
|                                                                                                    | 683.862 | No hits                                                  |
|                                                                                                    | 701.874 | No hits                                                  |
|                                                                                                    | 709.921 | No hits                                                  |
|                                                                                                    | 721.876 | Guanosine 3'-diphosphate 5'-triphosphate                 |
|                                                                                                    | 723.538 | Multiple endogenous compounds                            |
|                                                                                                    | 735.575 | Multiple endogenous compounds                            |
|                                                                                                    | 743.041 | No hits                                                  |
|                                                                                                    | 744.901 | No hits                                                  |
|                                                                                                    | 756.537 | Multiple endogenous compounds                            |
|                                                                                                    | 761.013 | No hits                                                  |
|                                                                                                    | 765.899 | No hits                                                  |
|                                                                                                    | 769.661 | Multiple endogenous compounds                            |
|                                                                                                    | 771.510 | Multiple endogenous compounds                            |
|                                                                                                    | 775.998 | No hits                                                  |
|                                                                                                    | 777.007 | No hits                                                  |
|                                                                                                    | 788.907 | No hits                                                  |
|                                                                                                    | 789.854 | No endogenous compounds                                  |
|                                                                                                    | 791.911 | No endogenous compounds                                  |
|                                                                                                    | 800.029 | No hits                                                  |
|                                                                                                    | 804.602 | Multiple endogenous compounds                            |
|                                                                                                    | 804.843 | No hits                                                  |
|                                                                                                    | 806.052 | Coenzyme A                                               |
|                                                                                                    | 829.519 | Multiple endogenous compounds                            |
|                                                                                                    | 833.677 | Multiple endogenous compounds                            |
|                                                                                                    | 878.612 | Multiple endogenous compounds                            |
|                                                                                                    | 895.196 | No endogenous compounds                                  |
|                                                                                                    | 896.629 | Multiple endogenous compounds                            |
|                                                                                                    | 897.616 | Multiple endogenous compounds                            |
|                                                                                                    | 898.604 | Multiple endogenous compounds                            |
|                                                                                                    | 910.999 | No hits                                                  |
|                                                                                                    | 912.001 | No hits                                                  |
|                                                                                                    | 913.005 | No hits                                                  |
|                                                                                                    | 913.096 | No hits                                                  |
|                                                                                                    | 914.010 | No hits                                                  |
|                                                                                                    | 914.101 | Multiple endogenous compounds                            |
|                                                                                                    | 929.030 | No hits                                                  |
|                                                                                                    | 992.014 | No hits                                                  |
| Adducts: +H <sup>+</sup> , -H <sub>2</sub> O+H <sup>+</sup> , +Na <sup>+</sup> , +K <sup>+</sup>   |         |                                                          |
| * Difference between L-Acetylcarnitine in CNV and LPS&PLG cases is negligible i.e. numerical error |         |                                                          |

### S3. Light Microscopy Images with Depicted Glomerules (G), DCT and PCT

Color coding: G – White; DCT – Yellow; PCT – Green.

Images used for IMS in the 200-650 Da range

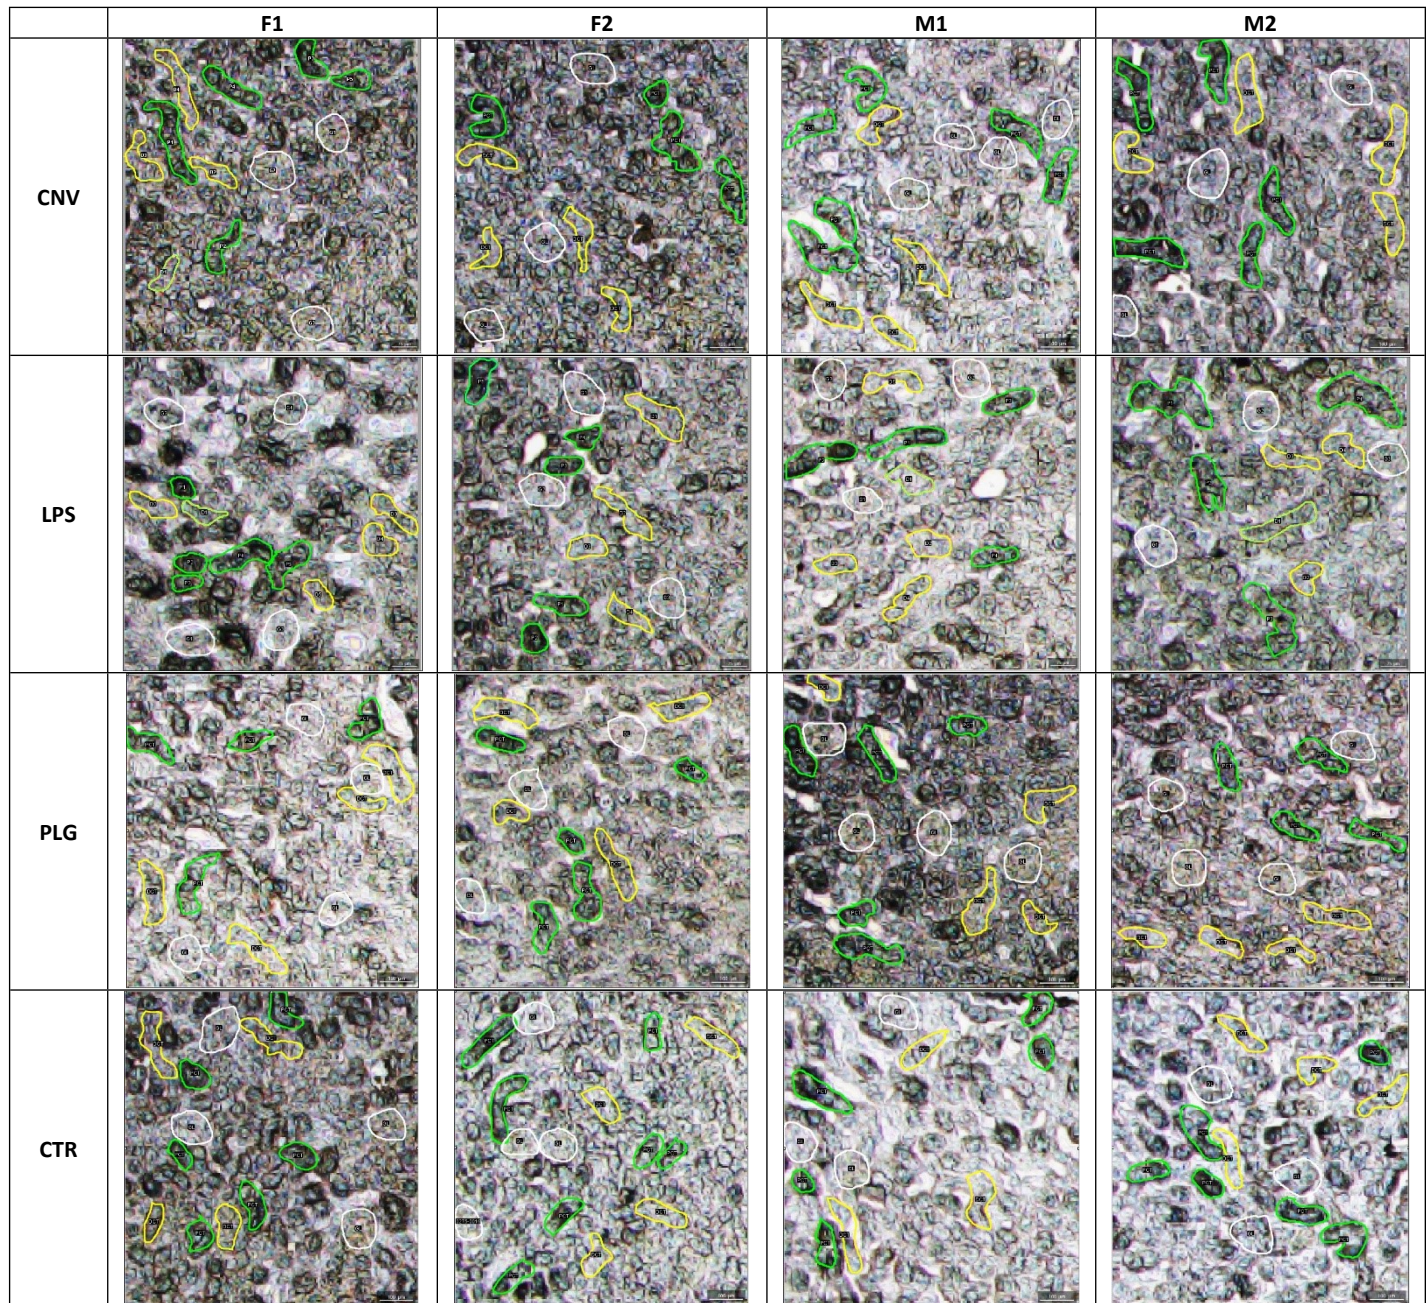



Images used for IMS in the 650-1000 Da range

|     | F1                                                                                  | F2                                                                                  | M1                                                                                   | M2                                                                                    |
|-----|-------------------------------------------------------------------------------------|-------------------------------------------------------------------------------------|--------------------------------------------------------------------------------------|---------------------------------------------------------------------------------------|
| CNV | 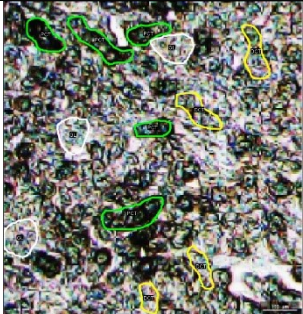   |    |    |    |
| LPS |    |    |    |    |
| PLG |   |   |   |   |
| CTR |  |  |  |  |

S4. List of Tissue Specific m/z Values Associated with Administration of LPS

G stands for “glomeruli”.

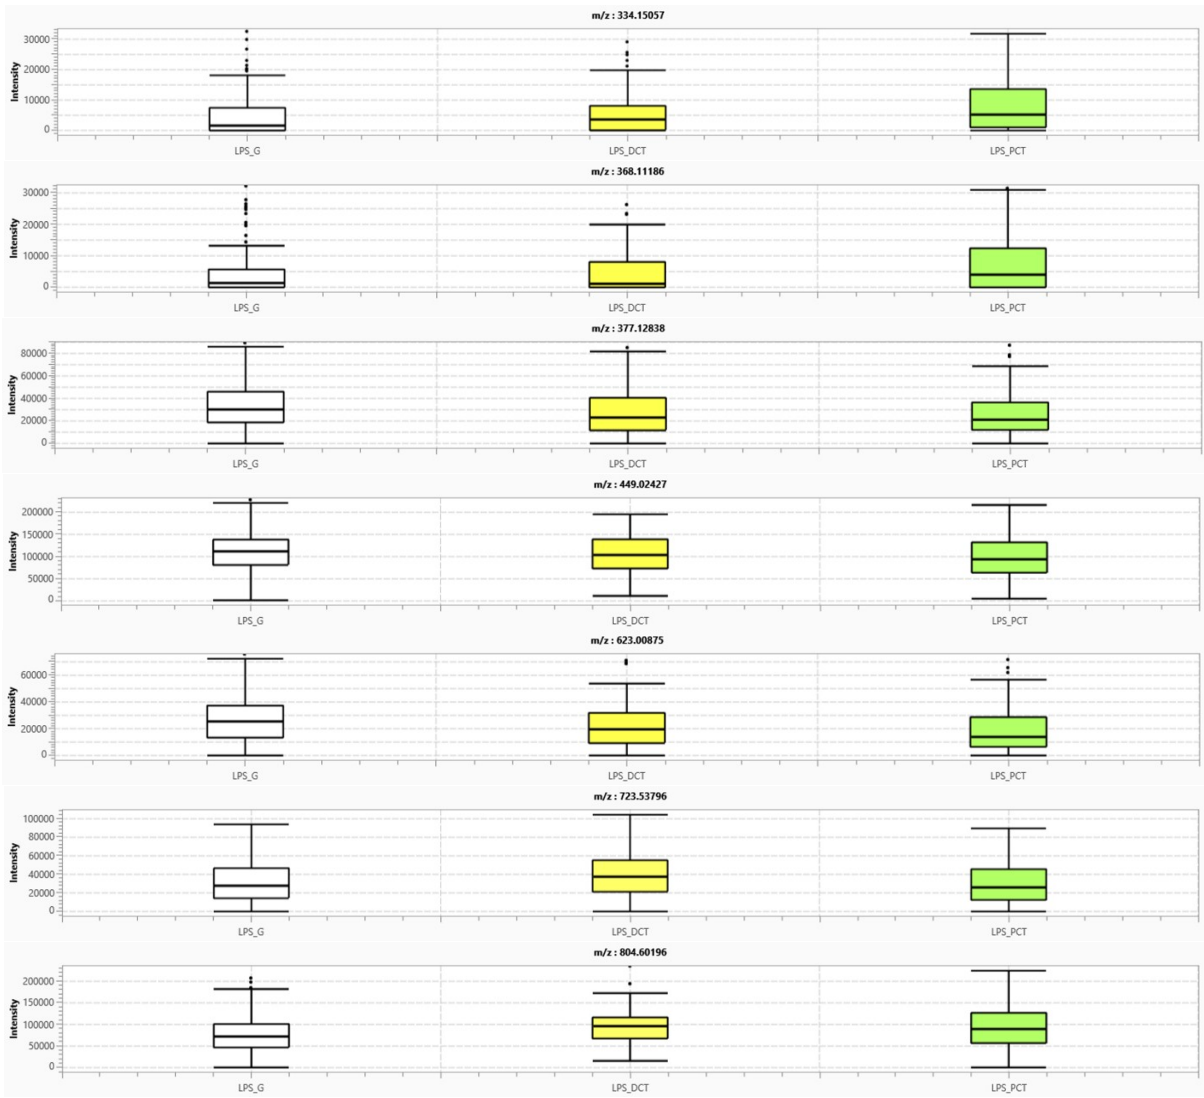



## S5. Physicochemical Characterization of Nanoformulations

Both, LPS and PLG, nanoformulations of DOX were characterized regarding their shape, size and size distribution and surface charge after dilution with saline. The particles were visualized by transmission electron microscopy (TEM) using the microscope TEM 902A (Carl Zeiss Meditec, Jena, Germany) operating in bright-field mode with an acceleration voltage of 80 kV. The images were captured using the attached Canon PowerShot S50 camera. The samples were prepared by droplet deposition on a Formvar®-coated copper grid. Hydrodynamic diameter ( $d_H$ ) and diameter distribution were determined by dynamic light scattering (DLS). The measurements were performed using Zetasizer Nano ZS (Malvern Instruments, Malvern, UK) equipped with a green laser (532 nm), at a detection angle of 173°.  $d_H$  was obtained from the size by intensity distribution function as an average of 10 measurements. Zeta ( $\zeta$ ) potential values were measured by electrophoretic light scattering (ELS) using the same instrument.  $\zeta$  potential was determined from the measured electrophoretic mobility using the Henry equation with Smoluchowski approximation, and the average of 3 measurements is reported. Both DLS and ELS measurements were conducted at 25 °C after 50-fold dilution of the samples in saline. All data was processed using the Zetasizer software (6.32; Malvern Instruments, Malvern, UK).

## Results

DOX nanoformulations were characterized using the standard techniques for evaluating size, size distribution and  $\zeta$  potential. TEM micrographs (Fig. S5) show LPS DOX as uniform dispersed liposomes of spheroid shape and around 100 nm in size, while PLG DOX are hard spheres roughly twice the size. According to DLS measurements, both nanoparticle types were uniform in terms of  $d_H$  with a monomodal distribution. LPS DOX were smaller in size with an average  $d_H$  of  $126.2 \pm 1.4$  nm, while PLG DOX were larger ( $252.4 \pm 12.7$  nm (Table S5). The  $\zeta$  potential was negative in both cases, with  $-48.3 \pm 0.8$  mV in LPS DOX case and  $-12.9 \pm 0.4$  mV in PLG DOX case.

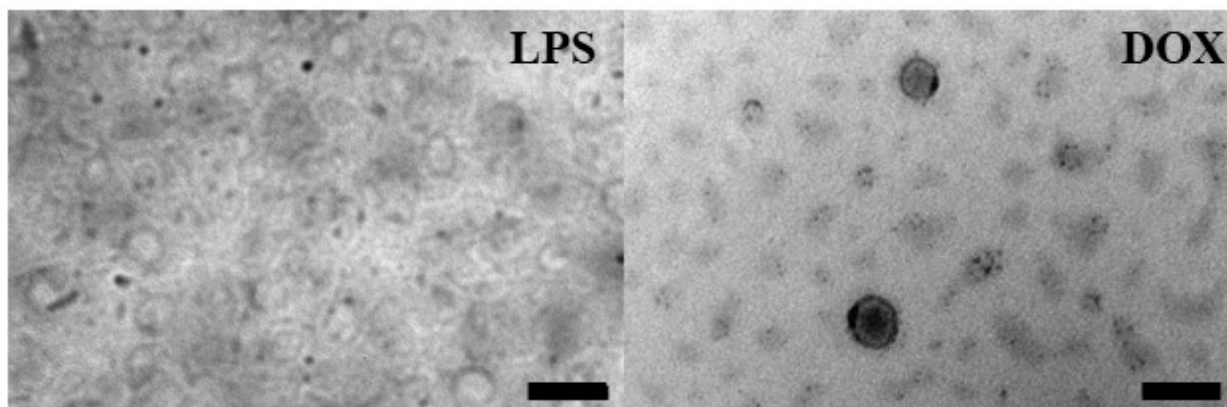

**Figure S5.** Transmission electron micrographs of LPS (left) and PLG (right). Scale bars are 200 nm.

**Table S5.** Physico-chemical characteristics of LPS and PLG formulations. hydrodynamic diameters ( $d_H$ , nm) were obtained by DLS, and z potential (mV) was measured using the ELS method. All measurements were done at 25 °C.

| Formulation | $d_H$ /nm (% Intensity) | $\zeta$ potential / mV |
|-------------|-------------------------|------------------------|
| LPS         | $126.2 \pm 1.4$ (100%)  | $-48.3 \pm 0.8$        |
| PLG         | $252.4 \pm 12.7$ (100%) | $-12.9 \pm 0.4$        |



## S6. Animal Experiments

Healthy Wistar rats of both sexes, aged 12 weeks and weighing 320-350 g body weight (b.w.) in case of males (M) and 190–220 g b.w. in case of females (F) were used in the study. Animals were bred under specific pathogen free (SPF) conditions at the Animal Breeding Unit, Institute for Medical Research and Occupational Health (IMROH), Zagreb, Croatia. They were acclimated in the controlled environment (temperature:  $23 \pm 2$  °C; humidity:  $55 \pm 7\%$  and light: 12 h light/dark cycle) and fed with standard GLP certified food (Mucedola, 4RF21, Italy) and water *ad libitum*. Each of the 3 experimental groups and a control group consisted of 2 M and 2 F animals (N=4x4). The dose of 3 mg DOX per kg of b.w., either in CNV, LPS or PLG dosage form, was administered intraperitoneally. Experimental groups received 4 doses of DOX, in 5-day intervals. The control group (CTR) received one dose of saline solution in volume equivalent to those given to experimental groups. 120 h after the last administration of DOX animals were sacrificed by exsanguination under general anesthesia using a cocktail of anesthetics (Narketan (Vetoquinol UK Ltd.) at 80 mg/kg b.w. and Xylapan (Vetoquinol UK Ltd.) at 12 mg/kg b.w.). Kidneys were immediately collected, transferred to the experimental tubes and frozen in liquid nitrogen. The samples were then stored at -70°C until further analysis.

## S7. Average Mass Spectra

Mass spectra of the kidney cortex averaged over each group of animals are given below.

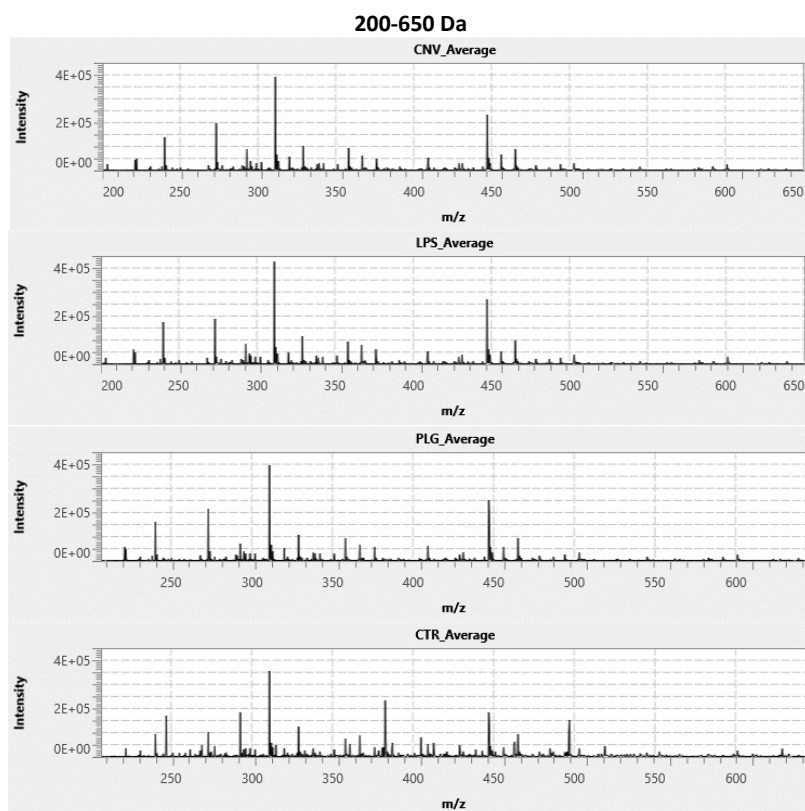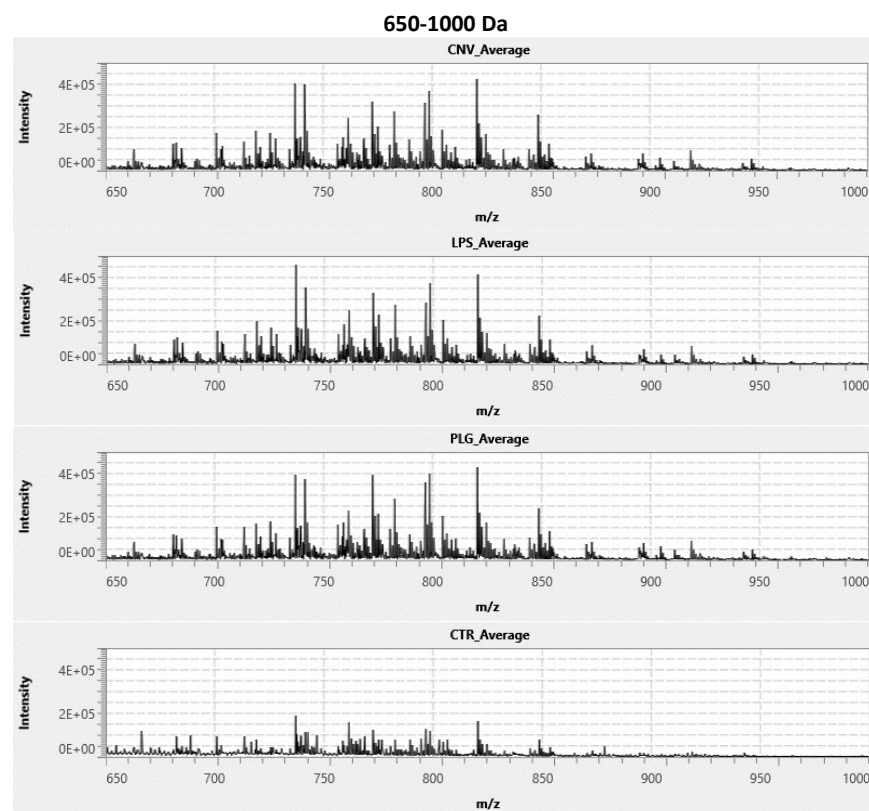

Supplement: d2an00355d1.pdf [file d2an00355d1.pdf]
